# Supplementary material for: Hybrid reduced graphene oxide nanosheets with negative magnetoresistance for the diagnosis of hypoglycemia
Source: Royal Society of Chemistry journal article supplement (doi:10.1039/d2tb01927b), 2022-12-23
Supplement: d2tb01927b1.pdf [file d2tb01927b1.pdf]

## ***Supporting Information***

### **Hybrid Reduced Graphene Oxide Nanosheets with Negative Magnetoresistance Used for Diagnosis of Hypoglycemia**

Longyi Chen<sup>a</sup>, Songlin Yang<sup>a</sup>, Michelle Dotzert<sup>b</sup>, C.W. James Melling<sup>b</sup>, and Jin Zhang<sup>a, c, \*</sup>

<sup>a</sup>Department of Chemical and Biochemical Engineering, University of Western Ontario,  
London, Ontario, Canada, N6A 5B9.

<sup>b</sup>School of Kinesiology, Faculty of Health Sciences, University of Western Ontario, London,  
Ontario, Canada, N6A 5B9.

<sup>c</sup>School of Biomedical Engineering, University of Western Ontario, London, Ontario, Canada,  
N6A 5B9.

\*Corresponding author: Jin Zhang, Email: [jzhang@eng.uwo.ca](mailto:jzhang@eng.uwo.ca)

### **Supplementary Figures:**

**Fig. S1.** Standard curve of Con A quantification by UV absorbance and quantity of Con A adsorbed on MR transducer.

**Fig. S2.** MR measurement by using a four-pint probe (Lakeshore, Model 74046 Magnetoresistance Probe). The electrode is made of tungsten.

**Fig. S3.** Standard curve of glucose concentration measured by DNS assay and the quantity of glucose adsorbed by magnetic labels.

**Fig. S4.** Standard curve of glucose concentration measured by DNS assay and the quantity of glucose adsorbed on modified MR transducer

**Fig. S5.** Quantification of the fluorescent magnetic labels, i.e.,  $\text{Fe}_3\text{O}_4@\text{SiO}_2$  NPs doped with dye (FITC). (a) UV-Vis absorbance spectra of magnetic labels. (b) The absorbance of the magnetic label doped with FITC as a function of the concentration of  $\text{Fe}_3\text{O}_4@\text{SiO}_2$  NPs doped with FITC.

**Fig. S6.** TEM micrographs of  $\text{Fe}_{50}\text{Co}_{50}$  NPs and rGO/ $\text{Fe}_{50}\text{Co}_{50}$  hybrid nanosheets samples (insets histogram showing corresponding NPs size distribution): (a)  $\text{Fe}_{50}\text{Co}_{50}$  NPs (scale bar 500 nm), (b) rGO(10%)/FeCo nanosheets. (c) rGO(20%)/FeCo nanosheets (scale bar 500 nm), and (d) rGO(30%)/FeCo nanosheets.

**Fig. S7.** Energy-dispersive X-ray analysis (EDX) of (a)  $\text{Fe}_{50}\text{Co}_{50}$  NPs (The copper and carbon peaks are from the copper grid); (b) rGO, and (c)  $\text{Fe}_{50}\text{Co}_{50}$  NPs deposited on rGO, i.e., rGO(30%)/FeCo nanosheets

**Table S1.** Magnetic properties of  $\text{Fe}_{50}\text{Co}_{50}$  NPs and rGO/ $\text{Fe}_{50}\text{Co}_{50}$  hybrid nanosheets at room temperature.

**Fig. S1**

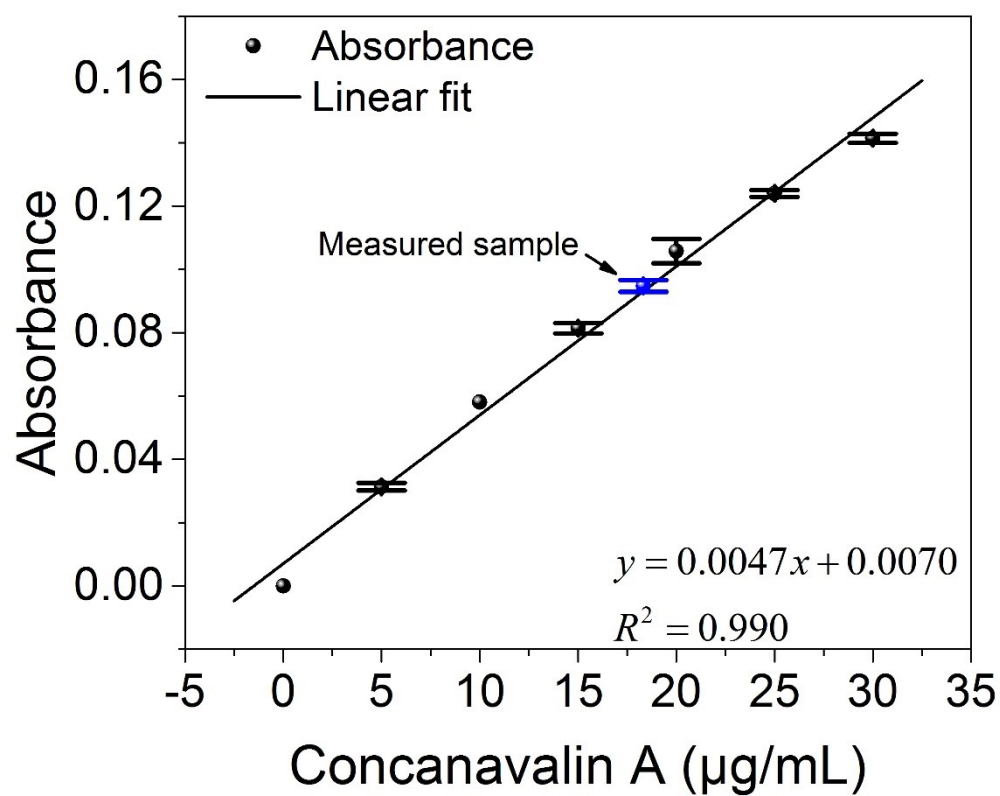

**Fig. S1.** Standard curve of Con A quantification by UV absorbance and quantity of Con A adsorbed on MR transducer.

**Fig. S2**

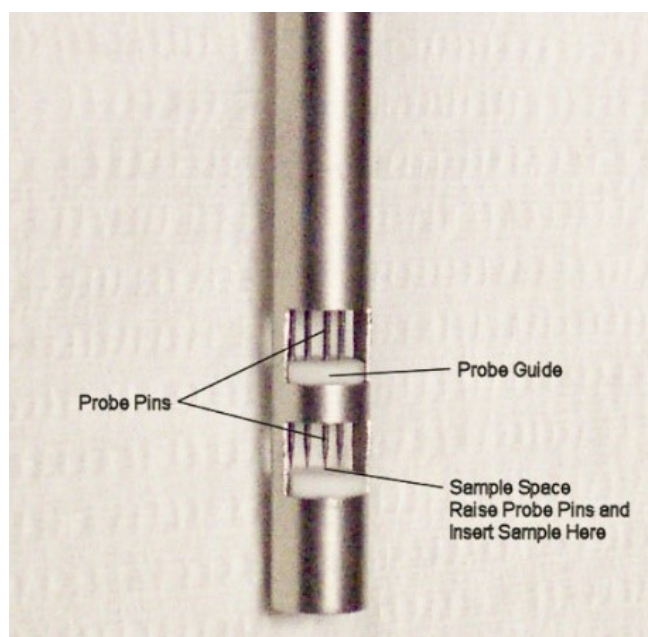

**Fig. S2.** MR measurement using a four-point probe (Lakeshore, Model 74046 Magnetoresistance Probe). The electrode is made of Tungsten.

Fig. S3

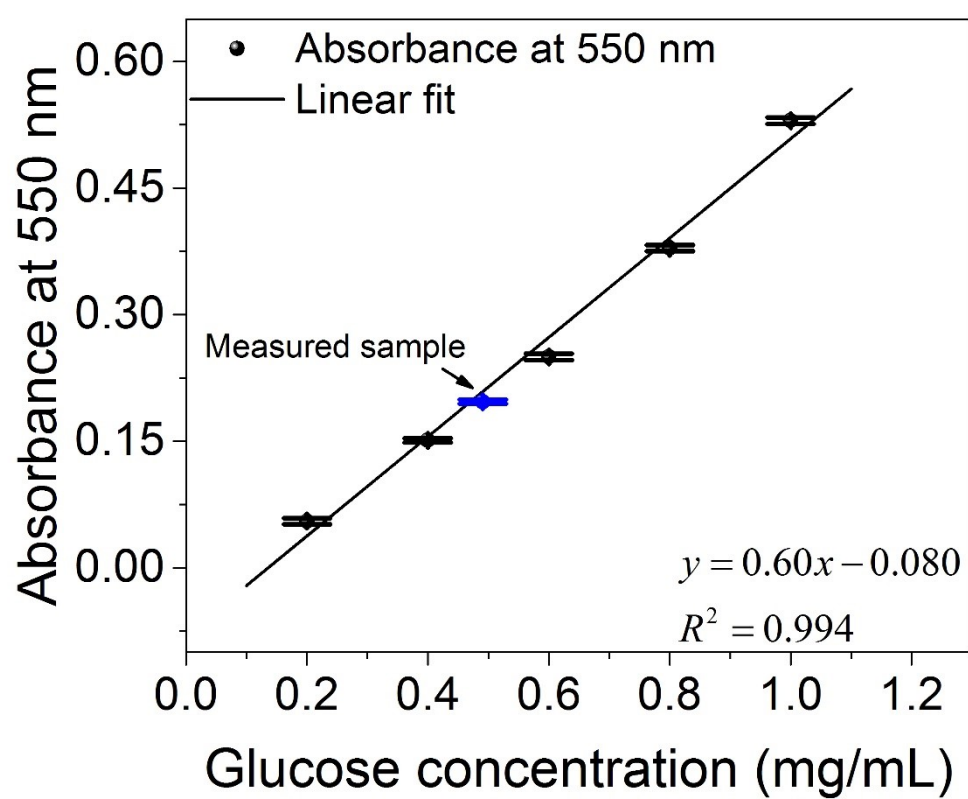

**Fig. S3.** Standard curve of glucose concentration by DNS assay and the quantity of glucose adsorbed by the magnetic label.

Fig. S4

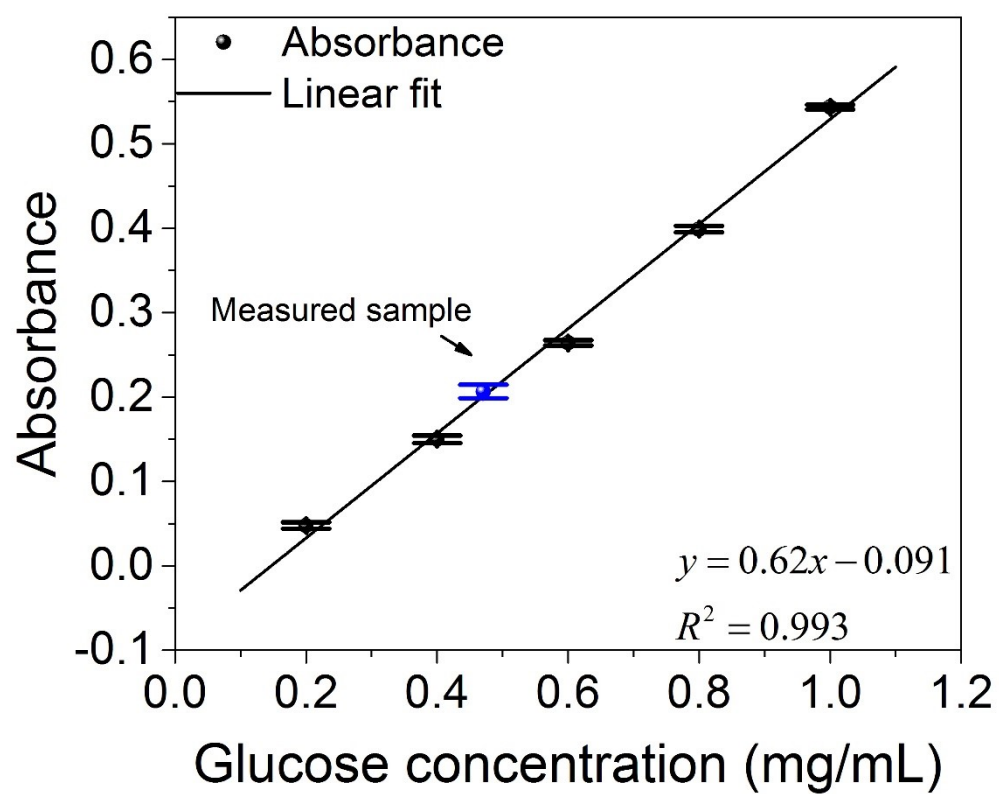

**Fig. S4.** Standard curve of glucose concentration by the measurement of DNS assay and the quantity of glucose adsorbed on modified MR transducer.

**Fig. S5**

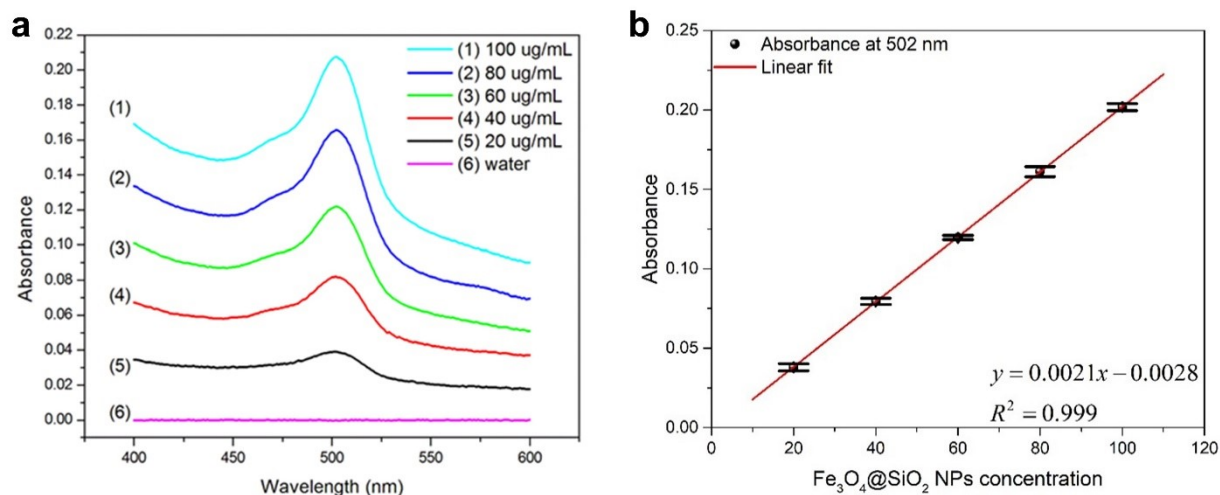

**Fig. S5.** Quantification of the fluorescent magnetic labels, i.e.,  $\text{Fe}_3\text{O}_4@\text{SiO}_2$  NPs doped with dye (FITC). (a) UV-Vis absorbance spectra of magnetic labels. (b) The absorbance of the magnetic label doped with FITC as a function of the concentration of  $\text{Fe}_3\text{O}_4@\text{SiO}_2$  NPs doped with FITC.

**Fig. S6**

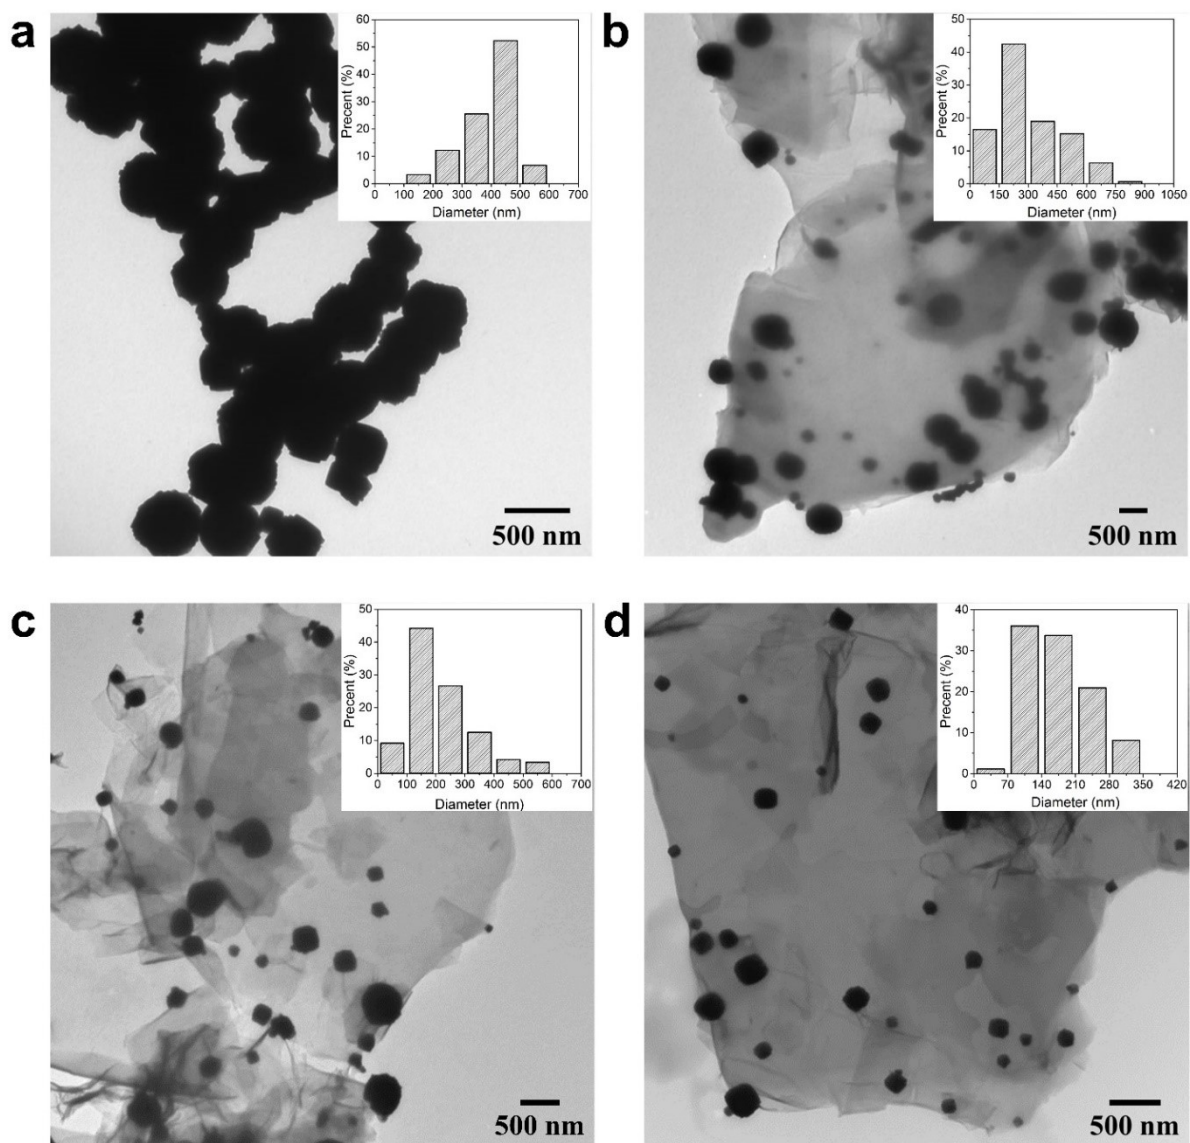

**Fig. S6.** TEM micrographs of  $\text{Fe}_{50}\text{Co}_{50}$  NPs and rGO/ $\text{Fe}_{50}\text{Co}_{50}$  hybrid nanosheets samples (insets histogram showing corresponding NPs size distribution): (a)  $\text{Fe}_{50}\text{Co}_{50}$  NPs (scale bar 500 nm), (b) rGO(10%)/FeCo nanosheets. (c) rGO(20%)/FeCo nanosheets (scale bar 500 nm), and (d) rGO(30%)/FeCo nanosheets.

**Fig. S7**

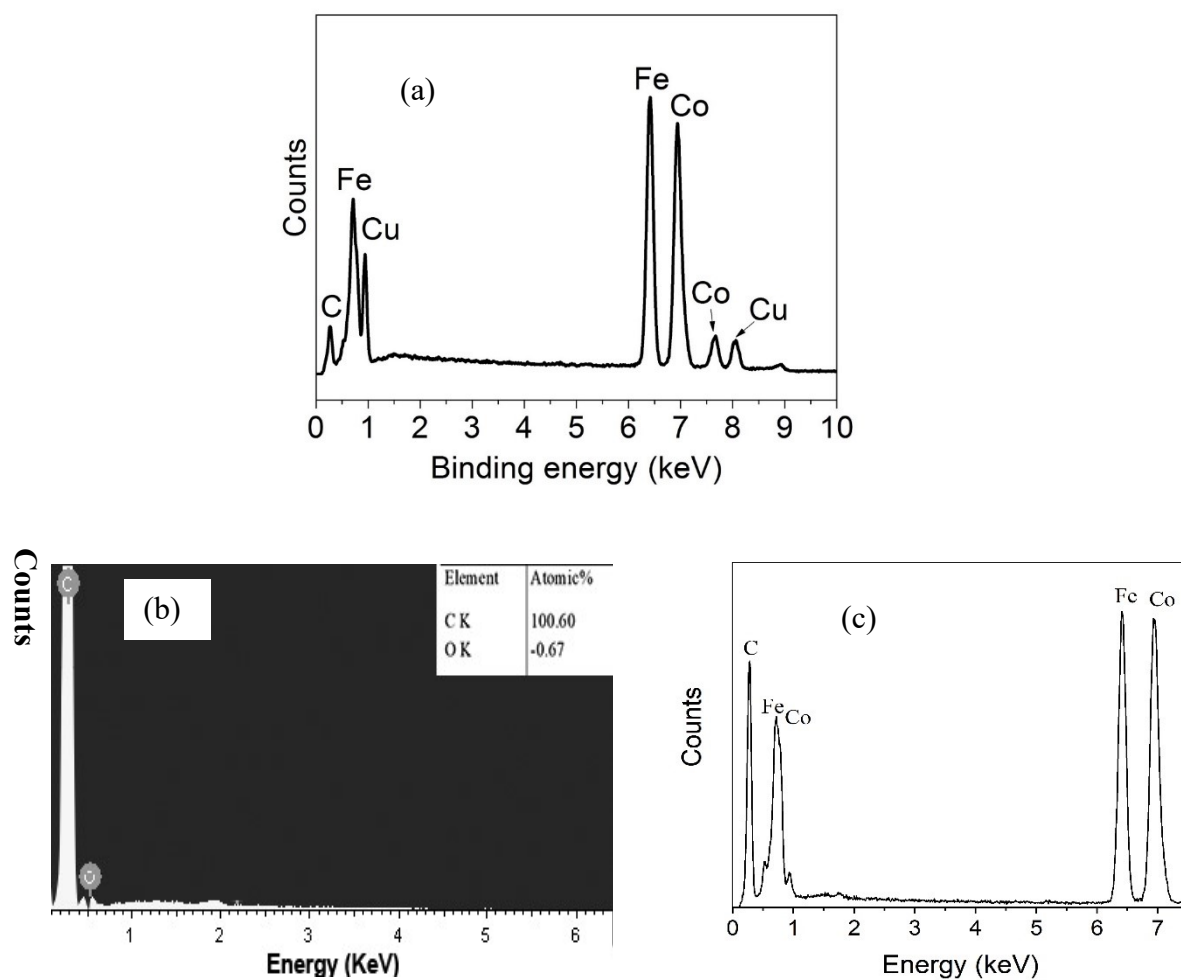

**Fig. S7.** Energy-dispersive X-ray analysis (EDX) of (a) Fe<sub>50</sub>Co<sub>50</sub> NPs (The copper and carbon peaks are from the copper grid); (b) rGO, and (c) Fe<sub>50</sub>Co<sub>50</sub> NPs deposited on rGO, i.e. rGO(30%)/FeCo nanosheets.(The carbon peaks are from the rGO).

**Table S1.** Magnetic properties of Fe<sub>50</sub>Co<sub>50</sub> NPs and rGO/Fe<sub>50</sub>Co<sub>50</sub> hybrid nanosheets at room temperature.

| Samples                               | M <sub>s</sub> (emu/g) | M <sub>r</sub> (emu/g) | M <sub>r</sub> /M <sub>s</sub> | H <sub>c</sub> (Oe) |
|---------------------------------------|------------------------|------------------------|--------------------------------|---------------------|
| Fe <sub>50</sub> Co <sub>50</sub> NPs | 203.3                  | 12.81                  | 0.063                          | 110.9               |
| rGO(10%)/FeCo                         | 97.5                   | 5.37                   | 0.055                          | 175.1               |
| rGO(20%)/FeCo                         | 78.0                   | 3.83                   | 0.049                          | 212.1               |
| rGO(30%)/FeCo                         | 39.9                   | 1.59                   | 0.040                          | 174.5               |
